# Supplementary material for: Stress resistance and lifespan enhanced by downregulation of antimicrobial peptide genes in the Imd pathway
Source: publisher site journal article supplement (doi:10.18632/aging.101417), 2018-04-19
Supplement: Supplementary file [file aging-v10i4-101417-supplementary-material-SD1.pdf]

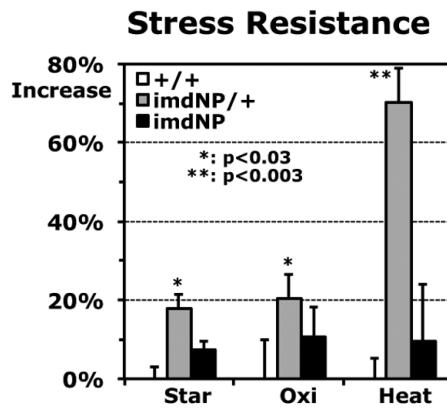

**Supplementary Figure S1. Stress resistance enhanced by 2-day-old *imdNP* mutant flies developed at 25°C.** The median survival times of wild-type control flies (+/+; 0%) were 34.0 hours in starvation, 18.5 hours under oxidation, and 10.5 hours with heat stress.

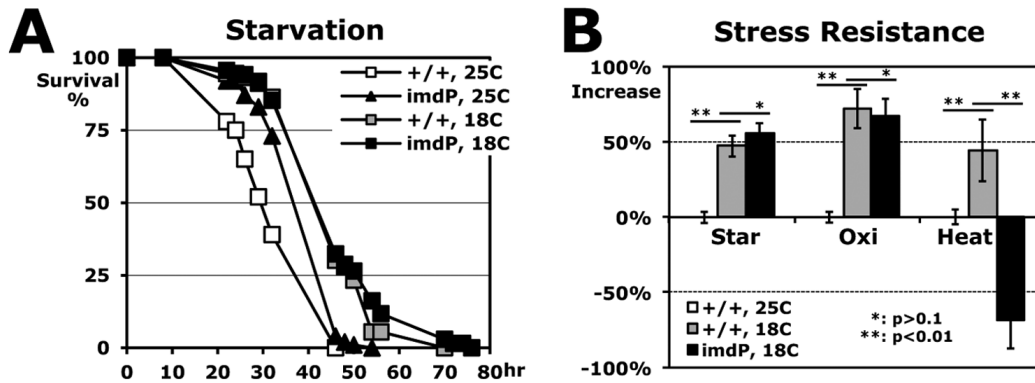

**Supplementary Figure S2. Stress resistance of *imdP* mutant flies developed at 18°C.** (A) The survival curve for starvation stress using 2-day-old male flies developed at 25°C or 18°C. (B) Comparison of stress resistance between wild-type and *imdP* mutant flies developed at 18°C. The changed percentage of median survival times under each stress (starvation, oxidation or heat) were calculated from wild-type flies developed at 25°C (+/+, 25C; 0%).
